# Supplementary material for: Microstructure defines the electroconductive and mechanical performance of plant-derived renewable carbon fiber
Source: Royal Society of Chemistry journal article supplement (doi:10.1039/c9cc05016g), 2019-01-01
Supplement: c9cc05016g1.pdf [file c9cc05016g1.pdf]

1 **Supplementary Material for:**

2 **Microstructure Defines the Electroconductive and Mechanical Performance of Plant-**  
3 **derived Renewable Carbon Fiber**

4 Qiang Li<sup>1,2,3</sup>, Cheng Hu<sup>1,2,3</sup>, Heidi Clarke<sup>4</sup>, Mengjie Li<sup>1,2,3</sup>, Patrick Shamberger<sup>4</sup>, Wenhao  
5 Wu<sup>5\*</sup>, Joshua S. Yuan<sup>1,2,3\*</sup>

6 <sup>1</sup>Synthetic and Systems Biology Innovation Hub, Texas A&M University, College Station, TX  
7 77843, USA

8 <sup>2</sup>Department of Plant Pathology and Microbiology, Texas A&M University, College Station, TX  
9 77843, USA

10 <sup>3</sup>Institute for Plant Genomics and Biotechnology, Texas A&M University, College Station, TX  
11 77843, USA

12 <sup>4</sup>Department of Materials Science and Engineering, Texas A&M University, College  
13 Station, TX 77843, USA

14 <sup>5</sup>Department of Physics and Astronomy, Texas A&M University, College Station, TX 77843,  
15 USA

16

17 \*For correspondence: Wenhao Wu: [wwu@physics.tamu.edu](mailto:wwu@physics.tamu.edu), Joshua S. Yuan: [syuan@tamu.edu](mailto:syuan@tamu.edu)

18

# 1. Plant cell wall layered structure and manufacturing routes for bioproducts of plant cell wall components

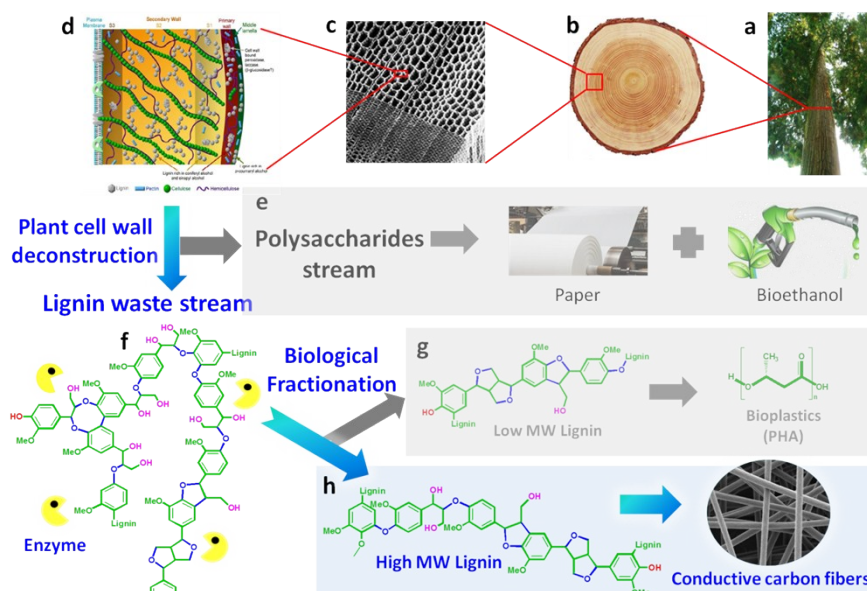

Figure S1. Plant cell wall layered structure and manufacturing routes for bioproducts of plant cell wall components. Images of a tree (a) and wood cross section (b), which displays porous structure (c) made of cell walls. Cell wall components, namely cellulose, hemicellulose, and lignin, are located in different layers of plant cell wall (d). Manufacturing of plant-derived products is initiated by cell wall deconstruction, which refines polysaccharides (cellulose and hemicellulose) and leaves unused lignin as a major waste stream. (e), polysaccharides are manufactured into paper and bioethanol in pulp and paper industry, and lignocellulosic biorefinery industry, respectively. (f), a representative lignin chemical structure, where lignin interunitary linkages, phenolic (Ar-OH) and aliphatic hydroxyl groups (Alk-OH) are in blue, green and pink, respectively. In our research, lignin waste was uniquely fractionated using enzyme to produce a low molecular weight (MW) fraction amenable for bioconversion (g), and a high molecular weight fraction suitable for conductive carbon fiber (h). Images in (c) and (d) were adapted from Uraki et al (2011)<sup>1</sup> and Achyuthan et al (2010),<sup>2</sup> respectively.

## 35 2. Experimental

### 36 2.1 Materials

37 Alkali Kraft lignin (370959) from softwood used in this research was purchased from  
38 Sigma–Aldrich, USA. Polyacrylonitrile (PAN) with molecular weight of 150,000 g/mol was  
39 purchased from Pfaltz & Bauer, USA. *N,N*-dimethylformamide (DMF, 99.8%) and other  
40 chemicals used were products of Sigma–Aldrich, USA.

### 41 2.2 Lignin enzymatic treatment

42 The enzymatic treatment of Kraft lignin was performed as we reported previously.<sup>1</sup> Briefly,  
43 Kraft lignin was treated with laccase (15 mg/g lignin), 1-hydroxy benzotriazolehydrate (HBT, 25  
44 mg/g lignin) and oxygen supply (flow rate 5 ccm) at a 10 wt% concentration for 48 h in a  
45 Biostat® A reactor (Sartorius, Bohemia, NY). The temperature and the stirring speed were  
46 controlled at 50 °C and 200 rpm, respectively. The water-soluble and water-insoluble lignin  
47 fractions can be obtained by centrifuging the samples after the enzymatic treatment. The former  
48 fraction was then precipitated out against pH 2 de-ionized water, and followed by washing three  
49 times with 200 mL of pH 2 de-ionized water. The water-insoluble fraction was also washed three  
50 times as the water-soluble fraction. Both water-soluble and water-insoluble lignin fractions were  
51 then lyophilized to get dry lignin powder.

### 52 2.3 Lignin characterizations

#### 53 2.3.1 <sup>31</sup>P nuclear magnetic resonance spectroscopy (<sup>31</sup>P NMR)

54 To reveal the reaction mechanism of lignin under laccase-mediator, the hydroxyl groups in  
55 lignin were extensively analyzed by using <sup>31</sup>P NMR.<sup>3-5</sup> Briefly, about 40 mg of lignin was firstly

56 dissolved in a pyridine/ $\text{CDCl}_3$  solution (400  $\mu\text{L}$ , 1.6:1, V/V). After complete dissolution,  
 57 relaxation reagent (chromium(III) acetylacetonate, 50  $\mu\text{L}$ , 11.4 mg/mL in pyridine/ $\text{CDCl}_3$ ) and  
 58 internal standard (cyclohexanol, 100  $\mu\text{L}$ , 10.85 mg/mL in pyridine/ $\text{CDCl}_3$ ) were added into  
 59 lignin solution, which was followed by the addition of the phosphorylation reagent (2-chloro-  
 60 4,4,5,5-tetramethyl-1,3,2-dioxaphospholane, TMDP, 100  $\mu\text{L}$ ). Before transferring the mixture  
 61 into a NMR tube (5 mm O.D.), the phosphorylation reaction was further kept for 30 min at room  
 62 temperature.  $^{31}\text{P}$  NMR spectra were acquired under a Varian NMRS-500RM by using a  $90^\circ$  pulse  
 63 with 25-s pulse delay and 256 acquisitions.<sup>4-5</sup>

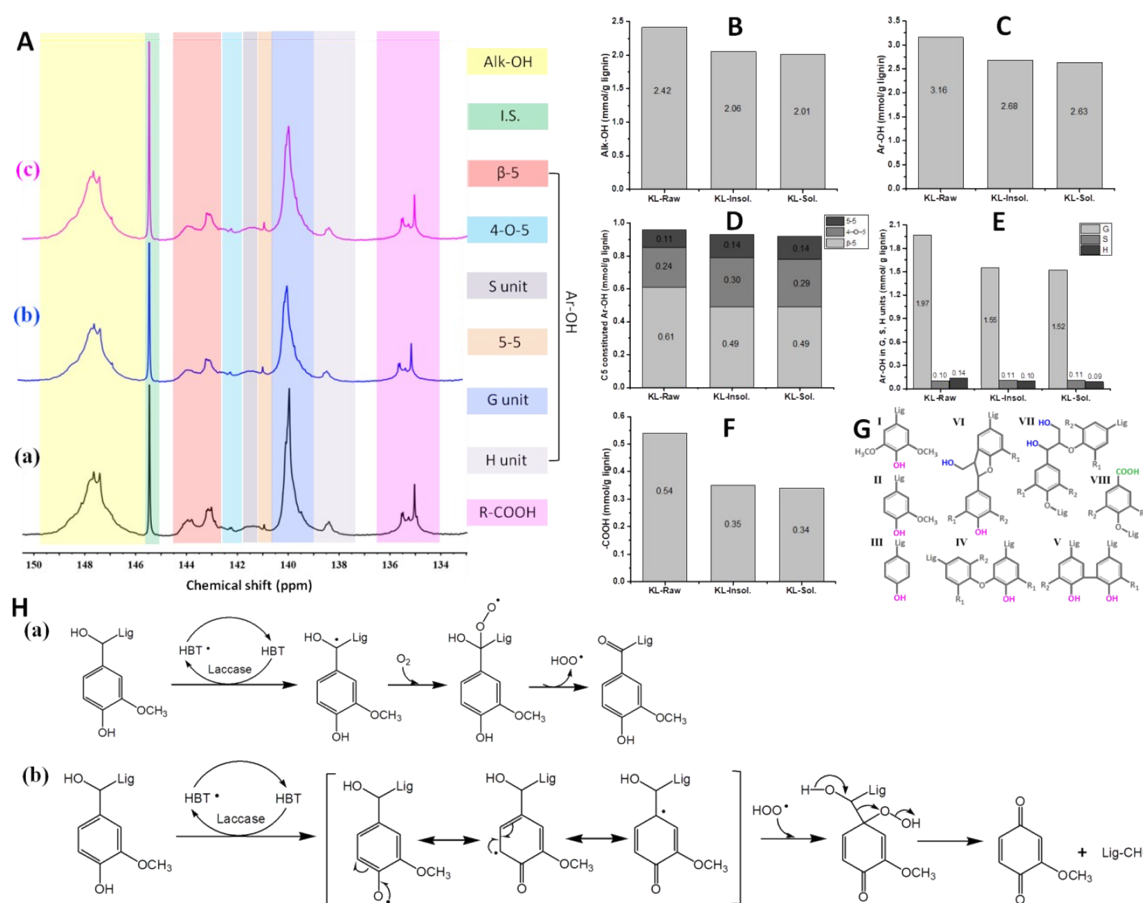

65 Figure S2. The content of hydroxyl groups in lignin measured by  $^{31}\text{P}$  NMR. A,  $^{31}\text{P}$  NMR spectra  
 66 of KL Raw (a), KL-Insol. (b), and KL-Sol. (c); B, the content of aliphatic hydroxyl groups (Alk-

OH); C, the content of phenolic hydroxyl groups (Ar-OH); D, Ar-OH in C5 substituted lignin units (IV, V, and VI in G); E, Ar-OH in syringyl (S), guaiacyl (G), and *p*-hydroxyphenyl (H) units; F, the content of carboxylic acid (-COOH) in lignin; G, hydroxyl groups (Ar-OH in magenta, Alk-OH in blue) in representative lignin units of syringyl (I), guaiacyl (II), *p*-hydroxyphenyl (III), 4-O-5 (IV), 5-5 (V),  $\beta$ -5 (VI), and  $\beta$ -O-4 (VII). Carboxylic acid (green) is shown in VIII in panel G. 4-O-5, 5-5, and  $\beta$ -5 represent C5 substituted lignin units; H, possible reaction mechanism of lignin under laccase-mediator treatment, which lignin could undergo benzylic hydrogen abstraction (a) and phenolic hydrogen abstraction (b). I.S. is internal standard, and Lig in panel H represented lignin moiety.

### 2.3.2 Two-dimension heteronuclear single quantum coherence NMR spectroscopy (2D HSQC NMR)

Analysis of lignin using 2D HSQC NMR and the semi-quantification were as we reported previously.<sup>6</sup> Briefly, 150 mg of acetylated lignin were analyzed using a Bruker AVANCE 500 MHz spectrometer. The integration and semi-quantification of both lignin units and linkages were carried out using the software MestReNova. The aromatic regions of HSQC spectra were shown in Figure S3. The dominated guaiacyl (G) peaks and trace syringyl (S) peaks were detected. The volume integration of the peaks of G<sub>2</sub> and S<sub>2/6</sub> at  $\delta C/\delta H$  113.3/7.0 ppm and  $\delta C/\delta H$  103.8/6.7 ppm, respectively, were measured. The S integrals were logically halved. For all raw and fractionated lignin, the G units were at about 92 %. This result is consistent with the <sup>31</sup>P NMR characterization that G units dominated the Kraft lignin we used, which further indicated that this lignin is a softwood lignin.

88 In our previous paper,<sup>6</sup> we have reported the linkage profiles of the relative frequencies,  
 89 which were calculated from the ratio of the volume integration of each linkage to that of all  
 90 linkages. Here we calculated the linkage profiles based on 100 aromatic groups (%), which were  
 91 the volume integrations of G ( $G_2$ ,  $\delta C/\delta H$  113.3/7.0 ppm) and S ( $S_{2/6}$ ,  $\delta C/\delta H$  103.8/6.7 ppm) units.  
 92 The results were as shown in Figure S4. The raw Kraft lignin had 8.35  $\beta$ -O-4 linkages per 100  
 93 aromatic groups (8.35 %), and water-soluble lignin had lower  $\beta$ -O-4 (7.72%), while water-  
 94 insoluble lignin had higher  $\beta$ -O-4 (8.77%). Even though these data were much lower than before  
 95 we calculated as the relative content (61.5%, 57.1% and 68.5% for raw lignin, water-soluble  
 96 lignin and water-insoluble lignin, respectively), the changes of the data were in consistence.

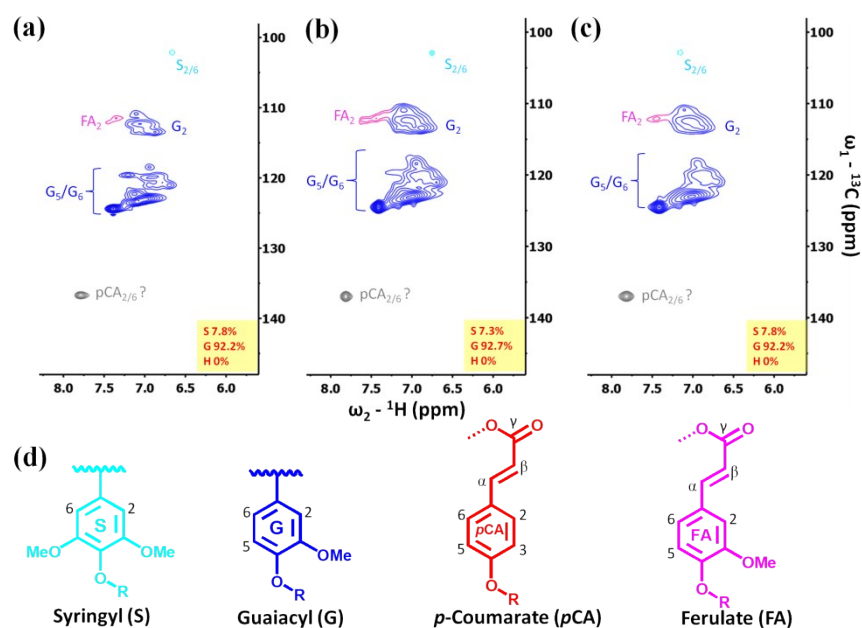

98 Figure S3. Aromatic regions of 2D HSQC NMR spectra of lignin samples. Panel a, b and c are  
 99 KL-Raw, KL-Sol., and KL-Insol., respectively. The chemical structures of S, G, *p*CA and FA are  
 100 in panel d. The chemical shifts of these structures are in Table S1.

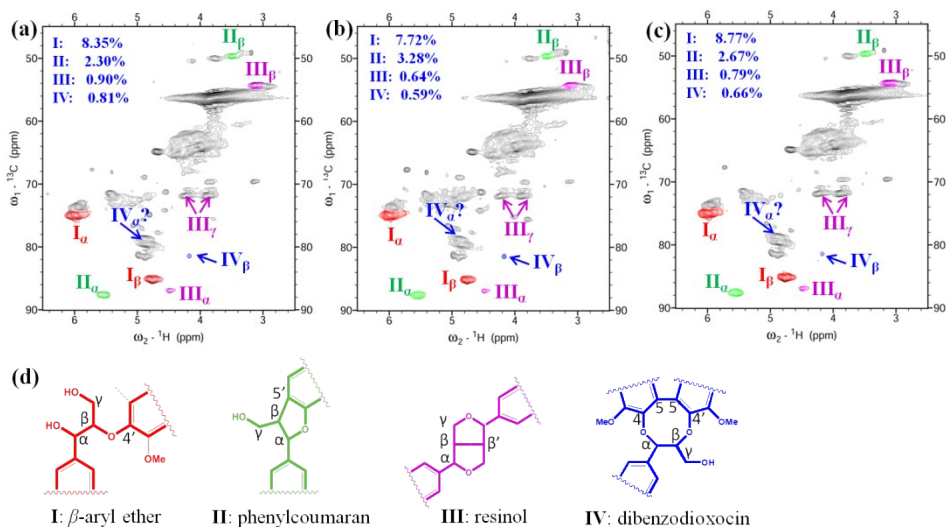

101

102 Figure S4. Aliphatic regions of 2D HSQC NMR spectra of lignin samples. Panel a, b and c are  
 103 KL-Raw, KL-Sol. and KL-Insol., respectively. The chemical structures of different lignin  
 104 linkages are in panel d. The chemical shifts of these linkages are in Table S1. The frequencies as  
 105 shown in each panel were calculated based on 100 aromatic groups (%).

106

Table S1. Assignments of lignin chemical structures in 2D HSQC NMR.<sup>1, 2</sup>

| Lignin structures and units* |                                                                                         | F2<br>(ppm) | F1<br>(ppm) |
|------------------------------|-----------------------------------------------------------------------------------------|-------------|-------------|
| Aliphatic region             | I $\alpha$ ( $\alpha$ position in $\beta$ -O-4')                                        | 6.0         | 74.5        |
|                              | II $\alpha$ ( $\alpha$ position in $\beta$ -5')                                         | 5.5         | 87.7        |
|                              | III $\alpha$ ( $\alpha$ position in $\beta$ - $\beta'$ )                                | 4.5         | 87.0        |
|                              | IV $\beta$ ( $\beta$ position in DBDO)                                                  | 4.2         | 81.5        |
| Aromatic region              | C <sub>2</sub> /H <sub>2</sub> in guaiacyl units (G <sub>2</sub> )                      | 7.0         | 111.3       |
|                              | C <sub>2,6</sub> /H <sub>2,6</sub> in <i>p</i> -hydroxyphenyl units (H <sub>2/6</sub> ) | n.d.        | n.d.        |
|                              | C <sub>2,6</sub> /H <sub>2,6</sub> in syringyl units (S <sub>2/6</sub> )                | 6.7         | 103.8       |
|                              | C <sub>2,6</sub> /H <sub>2,6</sub> in <i>p</i> -Coumarate (pCA <sub>2,6</sub> )         | 7.6         | 130.0       |
|                              | C <sub>2</sub> /H <sub>2</sub> in Ferulate (FA <sub>2</sub> )                           | 7.5         | 111.5       |

107 \*Units and linkages are shown in Figure S3d and Figure S4d, respectively. n.d., not detected.

### 2.3.3 Viscosity

The viscosity of wet spinning dopes (lignin/PAN blend and pure PAN) at the range of  $600\text{ s}^{-1}$  to  $0.1\text{ s}^{-1}$  was measured as before.<sup>6</sup> As shown in Figure S5, all lignin/PAN dopes had much lower viscosity than pure PAN, which could be accounted for the much higher molecular weight of the PAN polymer (150,000 g/mol) than lignin. For fractionated lignin samples, the water-insoluble lignin/PAN dope had higher viscosity than that of raw lignin/PAN dope, while the water-soluble lignin/PAN dope had decreased viscosity. These results were in consistent with the changes in lignin molecular weight, which water-insoluble lignin fraction (22965 g/mol) had increased molecular weight as compared with the raw lignin (8592 g/mol) but the water-soluble lignin (3197 g/mol) had decreased molecular weight.<sup>6</sup> The changes in lignin molecular weight could thereof render the changes of the viscosity of lignin/PAN dopes.

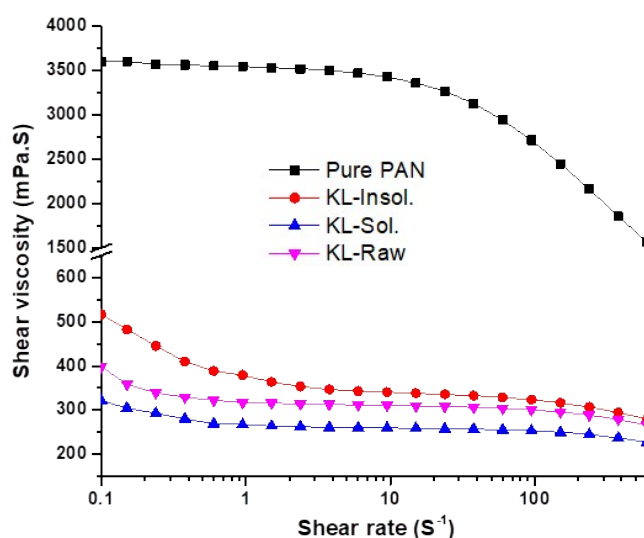

Figure S5. Viscosity of lignin/PAN dopes in DMF.



## 123 2.4 Carbon fiber preparation

### 124 2.4.1 Wet spinning

125 A homemade wet spinning unit was used to spin lignin into fibers. Lignin and PAN were  
126 firstly ground to pass a 60-mesh screen, and then mixed each other at a weight ratio of 50%:50%.  
127 The lignin/PAN mixture was dissolved in DMF at 60 °C with the concentration of 10 % to  
128 prepare the spinning dopes. The as-prepared dopes were then sonicated by using a Branson 1510  
129 sonicator for 2-h before spinning to remove existed air bubbles. In the spinning process, the  
130 dopes were injected into a methanol/DMF coagulation bath (-20 °C) using a micro-pump with  
131 the resolution of 0.73  $\mu\text{L/h}$  (NE-300, New Era Pump Systems Inc., Farmingdale, NY) to form  
132 fibers. The injection rate for all spinning was 0.08 mL/min. As-spun fibers were winded onto a  
133 rolling drum. After washing with deionized water, the fibers were cut and hanged under 15 g  
134 load until dry.

### 135 2.4.2 Thermostabilization

136 As-spun lignin precursor fibers were thermostabilized under atmosphere using a muffle  
137 furnace (GSL 1200X, MTI Corporation, Richmond, CA). The as-spun fibers were placed in  
138 crucibles. Heating was from room temperature to 250 °C at a rate of 1 °C/min, which was  
139 followed by holding the samples at 250 °C for 1 h before the furnace was automatically cooled  
140 down.

### 141 2.4.3 Carbonization

142 To prepare carbon fibers, as-thermostablized fibers were then carbonized in a split tube  
143 furnace with vacuum system (GSL 1600X, MTI Corporation, Richmond, CA) under argon gas

144 flow (240 cm<sup>3</sup>/min). The temperature for carbonization was increased from room temperature to  
145 1 000 °C with a heating rate of 5 °C/min and then held at 1000 °C for 1 h before the furnace was  
146 automatically cooled down.

147

## 148 **2.5 Carbon fiber characterizations**

### 149 **2.5.1 Field emission scanning electron microscope (FE-SEM)**

150 The morphologies of carbon fibers and fiber cross sections were observed under a Quanta  
151 600F FE-SEM (FEI Company, Hillsboro, OR) with 5kV accelerating voltage and 10 mm  
152 working distance. Prior the observation, carbon fibers were coated with 10 nm iridium (Ir). In  
153 order to get the morphologies of cross sections, fibers were mounted vertically on the SEM  
154 sample holder. For each carbon fiber, more than 40 different fibers were measured to get an  
155 average diameter.

156 As shown in Figure S6, lignin-based precursor fibers were prepared by a wet-spinning  
157 set-up. The average diameters of the resultant carbon fibers after carbonization at 1000 °C  
158 were at micron-scale level (33 to 36 μm, Figure S6C4-F4). The analysis of morphology  
159 and diameter showed that the enzymatic fractionation has significantly improved macro  
160 structures of the resultant carbon fibers. As shown in Figure S6C3-F3, carbon fiber made  
161 of un-fractionated lignin had defects of pores and debris on the cross section, yet the  
162 carbon fibers made from both water-insoluble and water-soluble lignin fractions  
163 displayed flat-layer-like transverse textures, which was similar to that of the pure PAN  
164 carbon fiber. For diameter distribution, the percentage of carbon fibers within the most  
165 frequent 3 μm diameter range were 86.4% within 33-36 μm for carbon fibers made from

166 water-insoluble lignin/PAN (Figure S6D4) and 85.0% within 36-39  $\mu\text{m}$  for carbon fibers  
 167 made from water-soluble lignin/PAN (Figure S6E4). Both percentages were much higher  
 168 than that made from un-fractionated lignin/PAN (57.5% within 33-36  $\mu\text{m}$ , Figure S6C4).  
 169 All of these improvements in carbon fiber macrostructures correlated to the enhancement  
 170 in microstructures and in the functionality for both mechanical and electroconductive  
 171 performances.

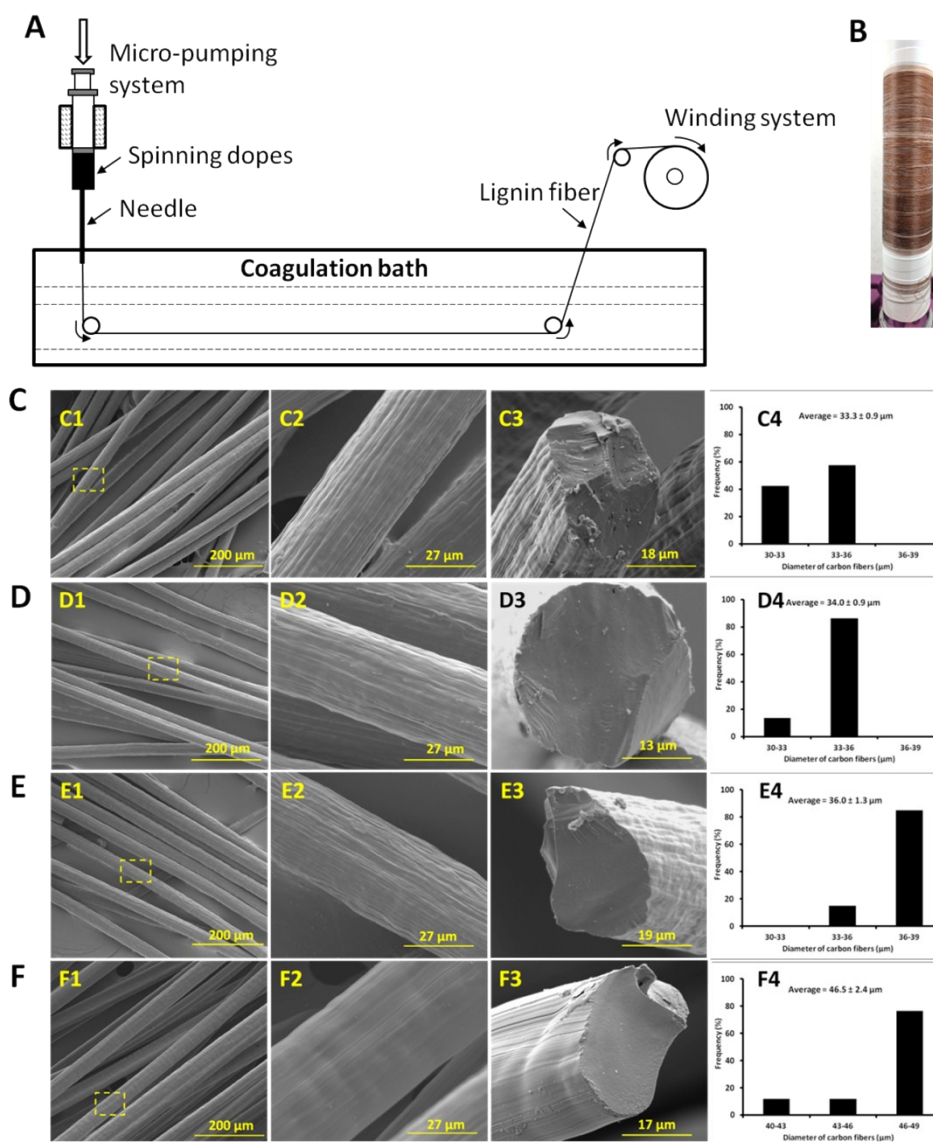

172

173 Figure S6. The wet-spinning set-up for making lignin fibers (A) and the as-spun fibers collected  
174 on the wind drum (B). SEM of carbon fibers were in C to F. C, D, E, and F were carbon fibers  
175 made of KL-Raw, KL-Sol, KL-Insol., and pure PAN, respectively. The histograms in C4 to F4  
176 showed the diameter distributions of the corresponded carbon fibers. KL-Raw, raw Kraft lignin;  
177 KL-Insol., the insoluble fraction from laccase-mediator treated Kraft lignin; KL-Sol., the soluble  
178 fraction from laccase-mediator treated Kraft lignin.

### 179 **2.5.2 Mechanical test**

180 The mechanical strength of carbon fibers was measured by using a TestResources universal  
181 mechanical tester (Shakopee, MN). Carbon fibers were mounted on a paper sample holder with  
182 the help of super glue. The sample holder was then fixed on two grippers for the measurement.  
183 The force applied to samples was controlled by using with a 2 N load cell that has a resolution of  
184 0.0001 N. The displacement was controlled by an actuator with a position resolution of 0.06 mm.  
185 The displacement rate was set at 0.200 mm/min for all tests. The applied force ( $F$ ) and the  
186 corresponding displacement ( $d$ ) were synchronously monitored during the measurement. The  
187 original length ( $L$ ) of fibers was measured by using a vernier caliper. To get the area ( $A$ ) of each  
188 fiber, the morphologies of the cross sections of carbon fibers were observed under  
189 aforementioned FE-SEM after the test. The area was then calculated using the software ImageJ®.  
190 Stress-strain curves were plotted after getting stress ( $\sigma$ ) and strain ( $\varepsilon$ ) using the equations of  $\sigma =$   
191  $F/A$  and  $\varepsilon = d/L$ , respectively. The tensile strength represented the maximum stress at fracture  
192 and the modulus of elasticity (MOE) was obtained from the slop of the elastic deformation  
193 region in a stress-strain curve. Elongation (%) was calculated by  $d'/L \times 100$ , where  $d'$  is the  
194 displacement at the fracture. For each sample, at least 15 fibers were measured to give an  
195 average result.

### 196 2.5.3 Electric conductivity measurement

197 The conductivity of the carbon fibers was measured by using a Fluke 87 TRUE RMS  
198 multimeter. The measurement was as shown in Figure S7. A single fiber was fixed by silver  
199 paint (GC Electronics) onto a cover glass, and then the electrical resistance ( $R$ ,  $\Omega$ ) of the fibers  
200 between two silver paints was measured with the multimeter at ambient atmosphere. The  
201 electrical conductivity ( $\sigma$ , S/m) was calculated from the equation of  $\sigma = 1/\rho = L/(R \times A)$ , where  $\rho$  is  
202 electrical resistivity ( $\Omega \cdot \text{m}$ ),  $L$  (m) and  $A$  ( $\text{m}^2$ ) are the length and the cross section area of the fiber  
203 as measured, respectively. The length ( $L$ ) of the fiber was measured by using the aforementioned  
204 vernier caliper. To calculate the area ( $A$ ) of fiber cross section, the diameter of each fiber was  
205 measured under a Zeiss Axiophot microscope after the conductivity test, and at least 25 points on  
206 one fiber were measured to give an average fiber diameter.

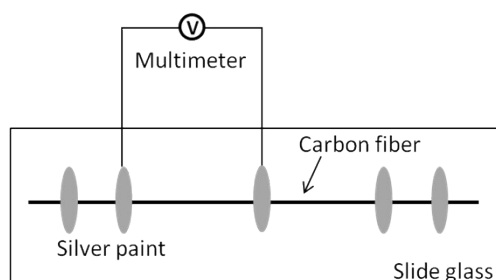

Figure S7. Schematic set-up of electrical conductivity.

### 209 2.5.4 X-ray diffraction (XRD)

210 XRD analysis of carbon fiber crystallite structures was performed under a Bruker D8  
211 Discovery XRD (Bruker, Madison, WI). To avoid the orientation preference, carbon fibers were  
212 ground into fine powders by an agate mortar and pestle before the measurement. X-ray resource  
213 was generated at 40 kV voltage and 40 mA current with Cu Ka wavelength ( $\lambda$ ) of 1.542 Å.  
214 Scanning range ( $2\theta$ ) was from  $8^\circ$  to  $55^\circ$ , scanning step size was  $0.05^\circ$ , and scanning rate was set

215 at 1.5°/min. The crystalline size ( $L_{hkl}$ ) was calculated from (002) panel around  $2\theta$  24.5° in the

216 XRD diffractograms using Scherrer equation:  $L = \frac{K\lambda}{\beta \cos \theta}$ , where  $L$  is the crystalline size, nm;  $K$   
 217 is shape factor, set as 0.94 in this calculation;  $\lambda$  is the X-ray wavelength (1.542 Å);  $\beta$  is the full  
 218 width at half maximum (FWHM) in radian;  $\theta$  is the Bragg angle in degree. The distance between  
 219 two crystalline lattices ( $d_{hkl}$ ) was estimated by using Bragg's law:  $2d \sin \theta = n \lambda$ , where  $d$  is  
 220 distance in nm;  $\theta$  is the Bragg angle in degree;  $n$  is set as 1. As shown in Figure S8, the  $d_{hkl}$   
 221 between each lignin fractions after the enzyme-mediator fractionation was similar to that of raw  
 222 Kraft lignin, indicated that the distance between two crystalline lattices in lignin-based carbon  
 223 fibers was not significantly improved. In comparison with lignin-based carbon fiber, pure PAN-  
 224 based carbon fiber had smaller  $d_{hkl}$  (0.356 nm), which could be attributed to the high molecular  
 225 weight and the uniform molecule structure of PAN polymers.<sup>4, 6</sup>

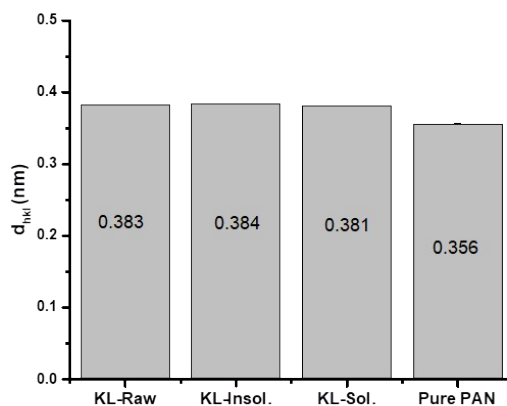

226

227 Figure S8. The distance between two crystalline lattices ( $d_{hkl}$ ) in carbon fibers as calculated from  
 228 Bragg's law.

## 229 2.5.5 Raman spectroscopy

230 The ground carbon fiber powder was mounted on a glass slide with the help of a double  
 231 adhesive tape, and Raman spectra were taken under a Horiba Jobin-Yvon LabRam Raman

232 Confocal Microscope with 633 nm laser, 10× magnification of objective lens, D0.3 filter, 200  
233 μm confocal pinhole, 10 s exposure time, and 10 accumulations. The D band (1348 cm<sup>-1</sup>) and G  
234 band (1581 cm<sup>-1</sup>) in Raman spectra were deconvoluted by Gaussian curve fitting method using  
235 Origin 9 software. The G/D ratios were calculated from the area ratios of these two bands.

236

### 237 **3. Reference**

- 238 1. Uraki, Y. et al. Fabrication of honeycomb-patterned cellulose material that mimics wood cell  
239 wall formation processes. *Mater. Sci. Eng. C* **31**, 1201-1208 (2011).
- 240 2. Achyuthan, K.E. et al. Supramolecular self-assembled chaos: Polyphenolic lignin's barrier to  
241 cost-effective lignocellulosic biofuels. *Molecules* **15**, 8641 (2010).
- 242 3. Crestini, C., Argyropoulos, D.S. Structural analysis of wheat straw lignin by quantitative <sup>31</sup>P  
243 and 2D NMR spectroscopy. The occurrence of ester bonds and α-O-4 substructures. *J. Agr. Food*  
244 *Chem.* **45**, 1212-1219 (1997).
- 245 4. Li, Q. et al. Tuning hydroxyl groups for quality carbon fiber of lignin. *Carbon* **139**, 500-511  
246 (2018).
- 247 5. Pu, Y., Cao, S. & Ragauskas, A.J. Application of quantitative <sup>31</sup>P NMR in biomass lignin and  
248 biofuel precursors characterization. *Energy Environ. Sci.* **4**, 3154-3166 (2011).
- 249 6. Li, Q. et al. Quality carbon fibers from fractionated lignin. *Green Chem.* **19**, 1628-1634 (2017).
